# Supplementary material for: Evolution of chemosensory tissues and cells across ecologically diverse Drosophilids
Source: PubMed Central journal article supplement (PMC10844241; doi:10.1038/s41467-023-44558-4), 2024-02-05
Supplement: 41467_2023_44558_MOESM3_ESM.pdf [file 41467_2023_44558_MOESM3_ESM.pdf]

## Description of Supplementary Data files:

**Supplementary Data 1:** Differentially expressed genes based on all 1:1 orthologs. This table contains the branch and tissue in which the expression changes occurred.

**Supplementary Data 2:** Gene Ontology (GO) terms associated with differentially expressed genes. This table contains GO terms enriched for differentially expressed genes (up- and down-regulated) on each tree branch for all tissues. The table also includes the list of differentially expressed genes contributing to significant GO term enrichment.

**Supplementary Data 3:** The list of chemosensory genes analyzed and the gene families that they belong to.

**Supplementary Data 4:** Orthologous Chemosensory genes expression results compared with previous descriptions in the literature. Genes with a TPM > 0.5 were defined as expressed. Each sheet is dedicated to a tissue. The “Summary” sheet presents the summary for all tissue comparisons. The “References” sheet provides the full reference list used to carry out the comparisons.

Colored cells indicate the following:

green: 1:1 ortholog that has species-specific expression.

blue: expressed genes in our datasets but not in the literature.

yellow: agreement with tissue expression but different species (possible polymorphism)

red: no match

purple: species-specific paralog

Values within cells indicate the following:

“ND”: denotes genes for which we could not find any evidence of expression in the literature.

“N”: denotes a gene absent in a given species.

**Supplementary Data 5:** The list of genes expressed in an individual tissue across all species.

**Supplementary Data 6:** Differentially expressed genes based on the curated chemosensory gene sets of 1:1 orthologs. This table contains the branch where the shift occurred and the tissues involved.

**Supplementary Data 7:** TPM values of each chemosensory 1:1 orthologs (first sheet) and mean expression values of duplicated chemoreceptors (second sheet).

**Supplementary Data 8:** Sex-biased genes separated by species and tissues. The  $p$ -values are based on a Wald test. The significance thresholds for these analyses were a  $\log(\text{fold change}) > 1.5$  and an (FDR) adjusted  $p < 0.01$ .

**Supplementary Data 9:** Detailed information on the molecular reagents used in this project.

**Supplementary Data 10:** The GTFs outputted by BRAKER.

**Supplementary Data 11:** Lookup table connecting Flybase gene IDs to the gene symbols outputted by BRAKER for all 1:1 orthologs.

**Supplementary Data 12:** RNA-seq Count tables for the entire dataset generated by HTseq.

**Supplementary Data 13:** TPM count tables based on File S2 for all 1:1 orthologs.

**Supplementary Data 14:** GTF files based on conserved genic regions between the six species' ("trimmed" GTFs) for the set of 1:1 orthologs.

**Supplementary Data 15:** RNA-seq Count tables based on the "trimmed" GTF file (File S4) generated by HTseq.

**Supplementary Data 16:** Lookup table connecting Flybase gene IDs to the gene symbols outputted by BRAKER for all genes (1:1 orthologs and lineage-specific duplicates).

**Supplementary Data 17:** GTF files for the manually curated set of chemosensory genes.

**Supplementary Data 18:** TPM count table for the manually annotated chemosensory gene set.
